# Supplementary material for: Sniffle: a step forward to measure in situ CO2 fluxes with the floating chamber technique
Source: Oxford University Press journal article supplement (doi:10.1525/elementa.275), 2018-01-01
Supplement: elementa-6-275-s1.docx [file elementa-6-275-s1.docx]

Supplemental material to:

*Sniffle*: a step forward to measure *in situ* CO2 fluxes with the floating chamber technique

M. Ribas-Ribas1*, L. F. Kilcher2 and O. Wurl1

1Institute for Chemistry and Biology of the Marine Environment, Carl von Ossietzky University of Oldenburg, Wilhelmshaven, Germany

2National Renewable Energy Laboratory, National Wind Technology Center, Golden, Colorado, United States

*[mariana.ribas.ribas@uol.de](mailto:mariana.ribas.ribas@uol.de)

Table S1: Data set for each individual flux calculation. Meteorological conditions observed visually (slicks and rain), FCO2: CO2 flux across the air-water interface; k660: gas transfer velocity normalized for the Schmidt number of 660; U10: wind speed at 10 m; water temperature at 1 m depth; aqueous *p*CO2;and R2: regression coefficient (R2) of the measured slope (dpCO2/dt) inside the chamber. Air *p*CO2 was 401.6 ± 7.7 µatm (n = 60).

| Date  (Month dd, 2016) | Time  [UTC] | Meteorological observations | FCO2·10−3  [mmol m−2 min−1] | k660  [cm h−1] | U10  [m s−1] | Water temperature  [°C] | *Aqueous p*CO2  [µatm] | R2 |
| --- | --- | --- | --- | --- | --- | --- | --- | --- |
| July 18 | 08:53-09:06 |  | 29.1 | 12.5 | 4.0 | 18.8 | 849.1 | 0.996 |
|  | 09:51-10:04 |  | 24.5 | 10.9 | 4.2 | 19.0 | 814.1 | 0.994 |
|  | 10:09-10:22 |  | 16.8 | 7.4 | 5.0 | 19.1 | 814.1 | 0.990 |
|  | 11:07-11:20 |  | 21.8 | 8.8 | 5.5 | 19.3 | 848.4 | 0.996 |
|  | 11:25-11:38 | Slick | 14.1 | 5.7 | 5.1 | 19.2 | 848.4 | 0.997 |
|  | 12:23-12:32 |  | 23.4 | 9.5 | 4.2 | 19.2 | 848.4 | 0.996 |
| July 19 | 09:27-09:40 |  | 29.6 | 12.9 | 1.9 | 19.7 | 839.3 | 0.998 |
|  | 09:45-09:58 |  | 16.3 | 7.1 | 2.3 | 19.4 | 839.3 | 0.997 |
|  | 10:43-10:56 |  | 24.0 | 10.4 | 2.9 | 20.0 | 828.9 | 0.998 |
|  | 11:02-11:14 |  | 15.3 | 6.6 | 3.4 | 19.9 | 828.9 | 0.996 |
|  | 11:59-12:12 |  | 24.1 | 10.7 | 4.0 | 19.6 | 818.2 | 0.999 |
|  | 12:17-12:30 |  | 15.2 | 6.8 | 3.0 | 19.6 | 818.2 | 0.996 |
|  | 13:15-13:28 |  | 23.2 | 10.2 | 2.4 | 20.2 | 818.2 | 0.998 |
| August 1 | 09:07-09:20 | Light rainfall | 38.0 | 12.5 | 4.5 | 21.5 | 936.2 | 0.955 |
|  | 09:25-09:38 | Light rainfall | 33.2 | 10.9 | 4.8 | 21.4 | 936.2 | 0.973 |
|  | 10:23-10:36 | Slick/thick foam | 10.5 | 3.3 | 6.2 | 21.4 | 952.3 | 0.985 |
|  | 10:41-10:54 | Slick | 13.2 | 4.2 | 5.9 | 21.4 | 952.3 | 0.991 |
|  | 11:39-11:52 |  | 20.5 | 6.7 | 1.6 | 21.4 | 930.5 | 0.999 |
|  | 11:57-12:02 |  | 31.1 | 10.1 | 1.9 | 21.4 | 930.5 | 0.997 |
